# Supplementary material
Source: Springer Nature journal article supplement (https://www.springerprofessional.de/resource/supplementary/13638_2013_902_MOESM10_ESM.pdf/11899170)

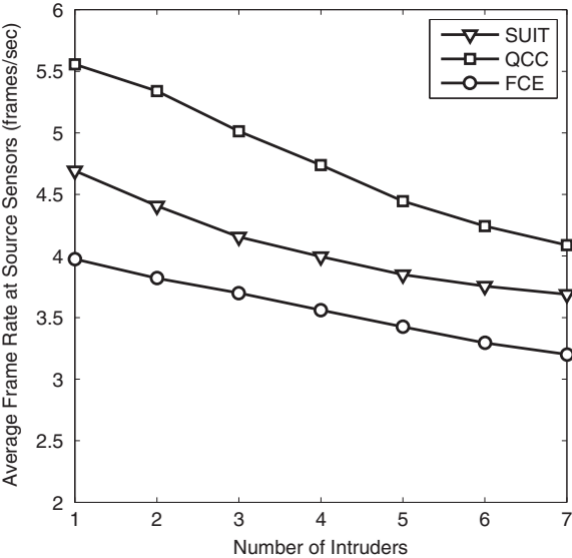

Supplement: MOESM10 [file 11899170]
